# Supplementary material for: Coupling Au-loaded magnetic frameworks to photonic crystal for the improvement of photothermal heating effect in SERS
Source: Royal Society of Chemistry journal article supplement (doi:10.1039/d2ra07262a), 2023-01-01
Supplement: d2ra07262a1.pdf [file d2ra07262a1.pdf]

## Coupling Au-loaded magnetic frameworks to photonic crystal for improvement of photothermal heating effect in SERS

Tianxing Wang,<sup>a</sup> Panpan Xiao,<sup>b</sup> Li Ye,<sup>a</sup> Pengcheng Zhu,<sup>a</sup> and Lin Zhuang<sup>\*a</sup>

<sup>a</sup>School of Physics, Institute for Solar Energy Systems, Guangdong Provincial Key Laboratory of Photovoltaics Technologies, Sun Yat-sen University, Guangzhou 510006, China

<sup>b</sup>School of Electronics and Information Technology, Sun Yat-sen University, Guangzhou 510006, China  
<sup>\*</sup>stszhl@mail.sysu.edu.cn

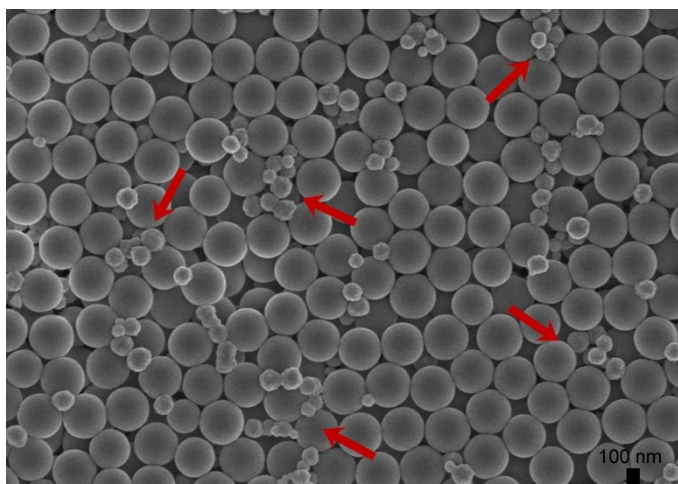

Fig. S1. SEM image of surface of Au-PC film (10 mL of Au solution).

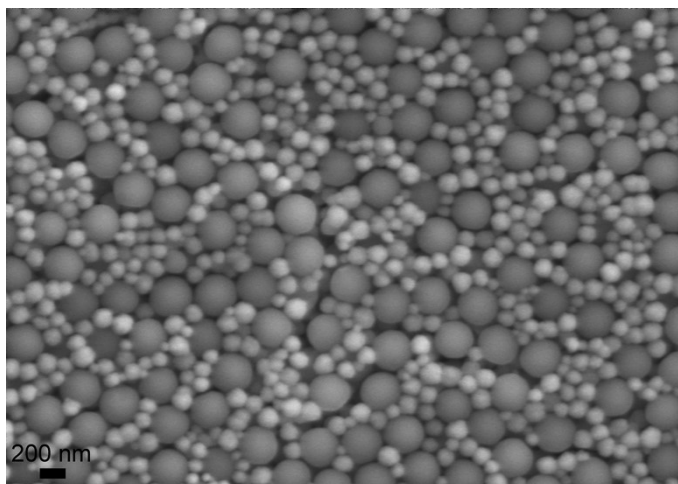

Fig. S2. SEM image of surface of Au-PC film (70 mL of Au solution).

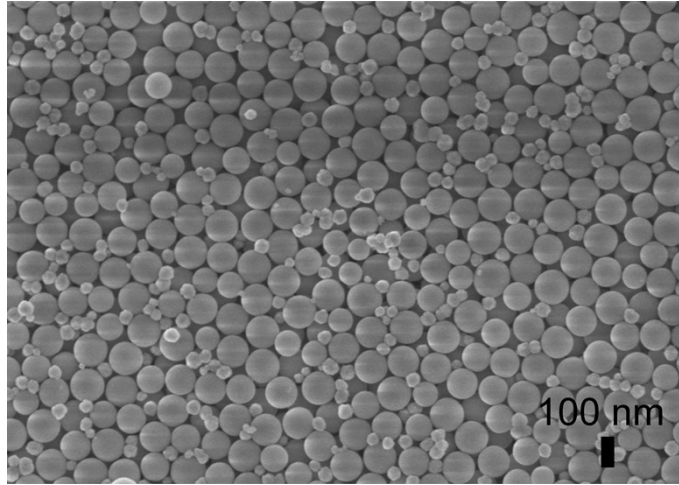

Fig. S3. SEM image of surface of Au-PC film (25 mL of Au solution).

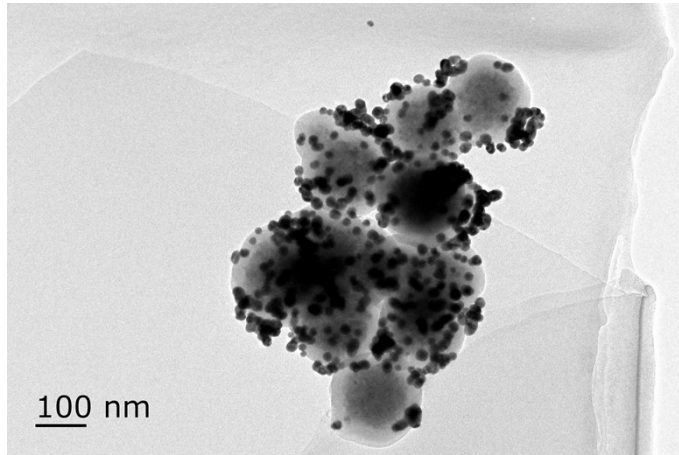

Fig. S4. TEM image of AuMF.

### S1. Discussion of reflection peak positions of AuMF-PC films

The reflectance spectra of AuMF-PC with various amounts of AuMFs display different reflection peak positions, which are in accordance with Bragg-Snell law. The peak wavelength can be predicted as:

$$\lambda = 2\sqrt{2/3}D\sqrt{n_{eff}^2 - \sin^2 \theta} \quad \backslash * \text{MERGEFORMAT (S1)}$$

where  $D$  is the diameter of silica nanosphere,  $\theta$  is the angle of the incident light (at normal incident  $\theta=0^\circ$ ), and  $n_{eff}$  is the effective refractive index of the medium. According to the above equation, the following relation is obtained.

$$\frac{D}{\lambda} \propto \frac{1}{n_{eff}} \quad \backslash * \text{MERGEFORMAT (S2)}$$

Generally,  $n_{eff}$  is calculated by:

$$n_{eff}^2 = fn_{material}^2 + (1-f)n_{void}^2 \quad \backslash * \text{MERGEFORMAT (S3)}$$

where  $n_{material}$  and  $n_{void}$  are refractive indices of the silica nanosphere and the interstitial void region, respectively. And  $f$  is the filling ratio. Hence, based on the above equations, the following relation can also be obtained.

$$\lambda \propto f \quad \backslash * \text{MERGEFORMAT (S4)}$$

Therefore, there is no significant changes in filling ratio when AuMFs dope into the voids of PC, due to ordered opal PC structures show no obvious disruption (as shown in Fig. 4(a)-(c)). According to the relation (S4), the peak wavelength  $\lambda$  increases with the  $f$ . Therefore, the increasing amount of AuMFs may lead to a higher filling ratio, due to plenty of interstitial void region would be occupied.

## S2. Calculation of enhancement factor of AuMF-PC substrate for SERS

Calculating the SERS EF value is a classical approach for evaluating the SERS performance of a substrate. The EF values can be estimated using the following standard equation:

$$EF = \frac{I_{SERS}}{I_{Bulk}} \times \frac{N_{Bulk}}{N_{SERS}} \quad \backslash * \text{MERGEFORMAT (S5)}$$

Where  $I_{SERS}$  and  $I_{Bulk}$  are the integrated intensities of the adsorbed molecules of  $10^{-6}$  M PATP solution ( $C_{SERS}$ ) on the surfaces of the AuMF-PC substrate and solid PATP ( $C_{Bulk}$ ) on the glass slide, respectively, and  $N_{SERS}$  and  $N_{Bulk}$  are the number of PATP molecules adsorbed on the AuMF-PC substrate surface and glass slide under the laser spot area, respectively. We have used the  $50\times$  microscopic lens ( $N_A=0.75$ ) to measure SERS signal.

The diameter of the focused spot on the samples ( $D$ ) and the exact transmission depth of the laser into the sample ( $h$ ) are determined by the following equations (S6, S7), where  $\lambda_{laser}$  is the excitation wavelength (nm),  $n$  is the refractive index of solid PATP powder ( $n \approx 1.6$ ), and  $N_A$  is the numerical aperture.

$$D = \frac{1.22\lambda_{laser}}{N_A} \quad \backslash * \text{MERGEFORMAT (S6)}$$

$$h = \frac{2.2n\lambda_{laser}}{\pi N_A^2} \quad \backslash * \text{MERGEFORMAT (S7)}$$

where  $n=1.6$ , and  $\lambda=633$  nm. The value of  $D$  is calculated to be  $1.03 \mu\text{m}$  and  $h$  is calculated to be  $1.26 \mu\text{m}$ , respectively.

The illuminated volume ( $V$ ) is determined by the penetration depth of the laser into the sample ( $h$ ) and the illuminated area ( $A$ ), is given by:

$$V = h \times A = h \times \pi \left( \frac{D}{2} \right)^2 \quad \backslash * \text{MERGEFORMAT (S8)}$$

The value of  $V$  is calculated to be  $1.05 \mu\text{m}^3$ , then the  $N_{Bulk}$  can be calculated by:

$$N_{Bulk} = N_A \times \frac{\rho V}{M_r} \quad \backslash * \text{MERGEFORMAT (S9)}$$

where  $\rho$  is the density of PATP ( $1.18 \text{ g/cm}^3$ ), The relative molecular mass  $M_r$  of PATP is about 125. The value of  $N_{Bulk}$  is calculated to be  $7.43 \times 10^{-15}$ . And the  $N_{SERS}$  is calculated by:

$$N_{SERS} = N_A \times \frac{AC_{SERS} V_1}{A_1} \quad \backslash * \text{MERGEFORMAT (S10)}$$

where  $V_1$  is the volume of PATP solution ( $V_1 = 2 \text{ mL}$ ),  $A_1$  is the SERS substrate area immersed in 2 mL of PATP solution ( $A_1 = 1 \text{ cm}^2$ , due to the substrate sample of size  $1 \text{ cm} \times 1 \text{ cm}$  was prepared). The value of  $N_{SERS}$  is calculated to be  $1.25 \times 10^{-17}$ . According to the measured SERS spectra, we can obtain the  $I_{SERS}$  and  $I_{Bulk}$  are 15879.32 (the mean value calculated by fifteen different spots for Fig. 7(c) in the main text) and 19.85 at  $1077 \text{ cm}^{-1}$ , respectively. Hence, the EF value of AuMF-PC substrate is calculated to be approximately  $4.76 \times 10^5$ .

**Table S1. The compositions of three film samples.**

| Film      | Composition                                           | Element |
|-----------|-------------------------------------------------------|---------|
| Silica PC | SiO <sub>2</sub> nanospheres                          | Si      |
|           |                                                       | O       |
| Au-PC     | SiO <sub>2</sub> nanospheres                          | Si      |
|           | Au NPs                                                | O       |
|           |                                                       | Au      |
| AuMF-PC   | SiO <sub>2</sub> nanospheres                          | Si      |
|           | Fe <sub>3</sub> O <sub>4</sub> @SiO <sub>2</sub> MNPs | O       |
|           |                                                       | Au NPs  |
